# Supplementary material for: Pyrimidine Schiff Bases: Synthesis, Structural Characterization and Recent Studies on Biological Activities
Source: MDPI journal article supplement (doi:10.3390/ijms25042076), 2024-02-08
Supplement: s1 [file s1]

# **Pyrimidine Schiff Bases: Synthesis, Structural Characterization and Recent Studies on Biological Activities**

**Iwona Bryndal <sup>1,\*</sup>, Marcin Stolarczyk <sup>1</sup>, Aleksandra Mikołajczyk <sup>2</sup>, Magdalena Krupińska <sup>2</sup>, Anna Pyra <sup>3</sup>, Marcin Mączynski <sup>1</sup> and Agnieszka Matera-Witkiewicz <sup>2</sup>**

<sup>1</sup> Department of Organic Chemistry and Drug Technology, Faculty of Pharmacy, Wrocław Medical University, 211A Borowska, 50-556 Wrocław, Poland; marcin.stolarczyk@umw.edu.pl (M.S.); marcin.maczynski@umw.edu.pl (M.M.)

<sup>2</sup> Screening Biological Activity Assays and Collection of Biological Material Laboratory, Wrocław Medical University, 211A Borowska, 50-556 Wrocław, Poland; aleksandra.mikolajczyk@umw.edu.pl (A.M.); magdalena.krupinska@umw.edu.pl (M.K.); agnieszka.matera-witkiewicz@umw.edu.pl (A.M.-W.)

<sup>3</sup> Faculty of Chemistry, University of Wrocław, 14 Joliot-Curie, 50-383 Wrocław, Poland; anna.pyra@uwr.edu.pl

\* Correspondence: iwona.bryndal@umw.edu.pl; Tel.: +48-71-784-02-36

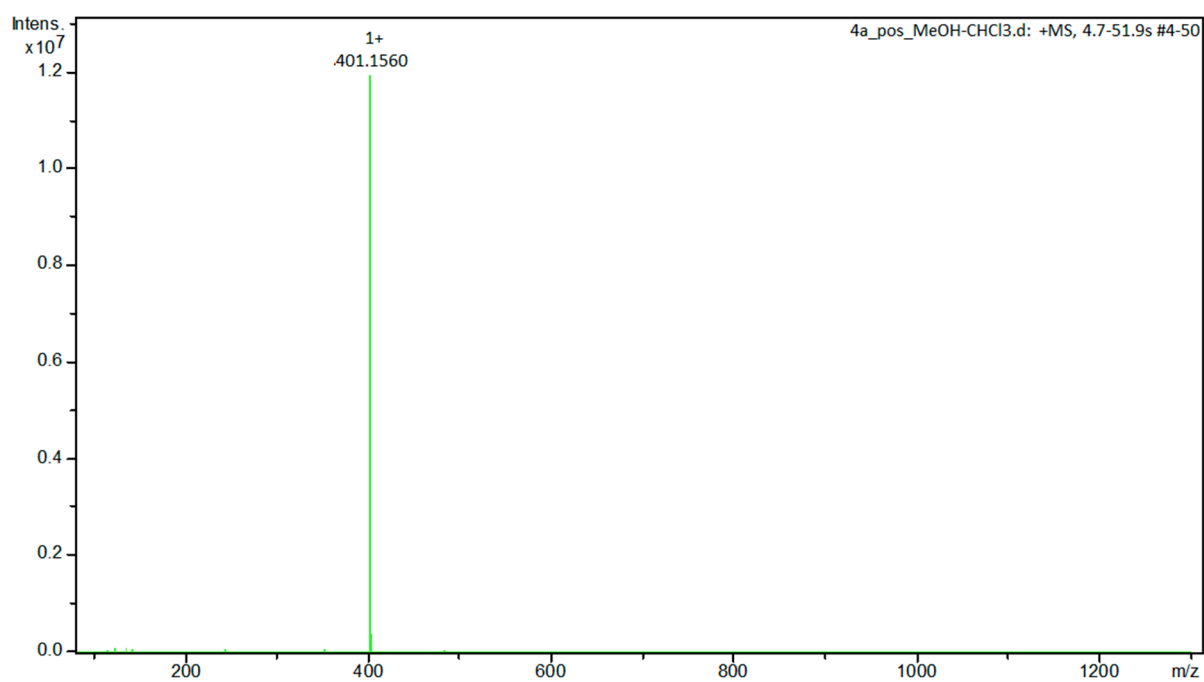

**Figure S1.** HR-ESI-MS spectra of compound **4a**.

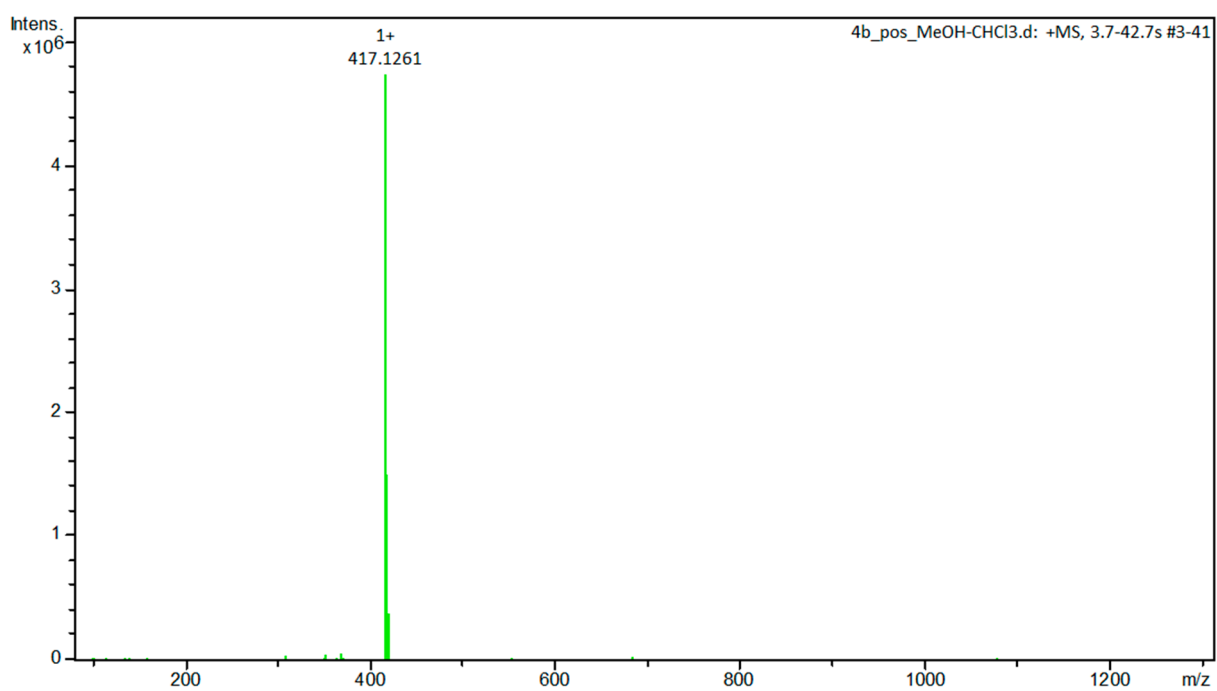

**Figure S2.** HR-ESI-MS spectra of compound **4b**.

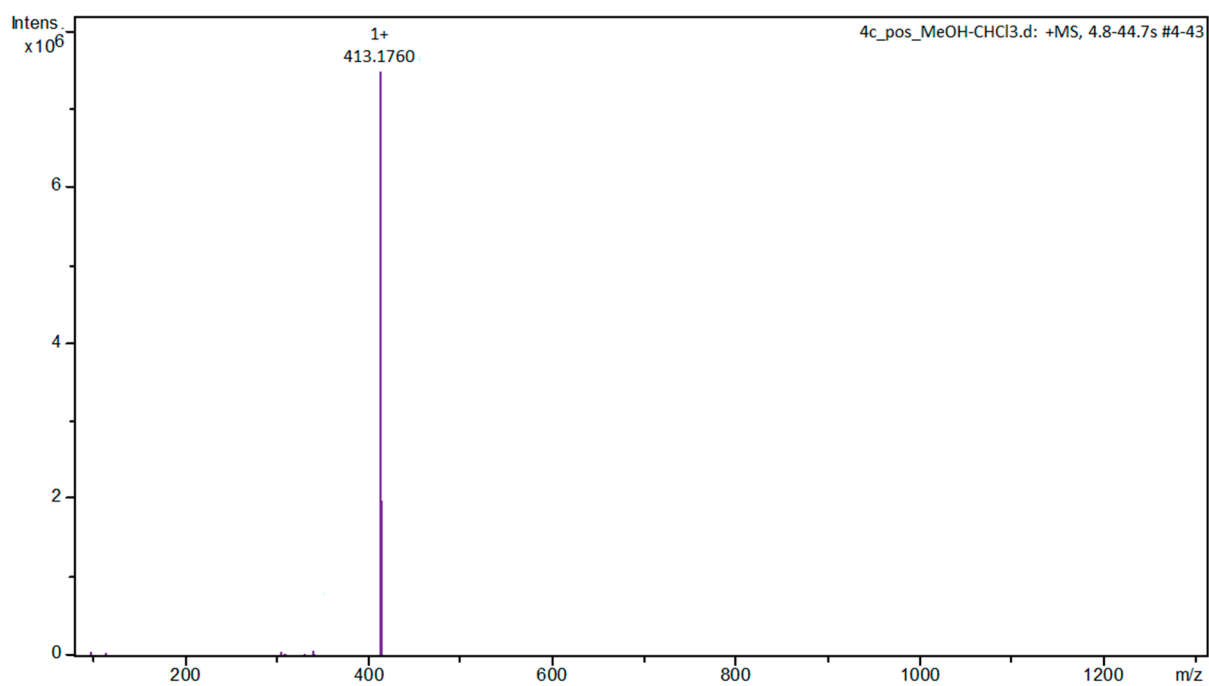

**Figure S3.** HR-ESI-MS spectra of compound **4c**.

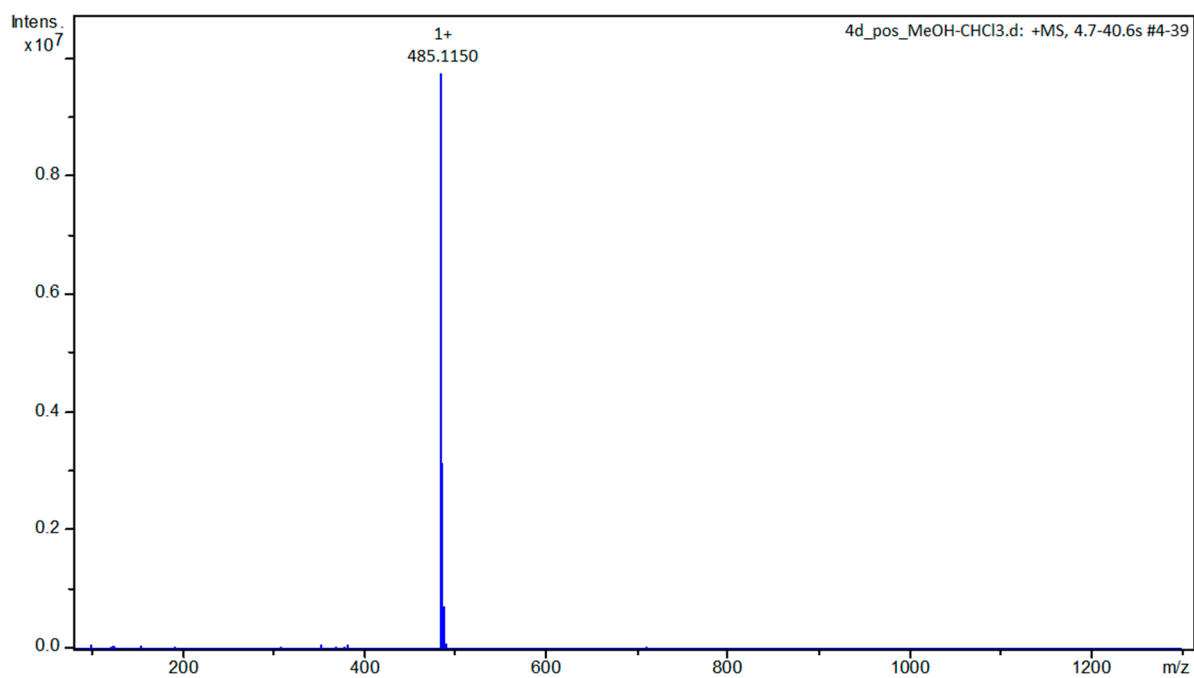

**Figure S4.** HR-ESI-MS spectra of compound **4d**.

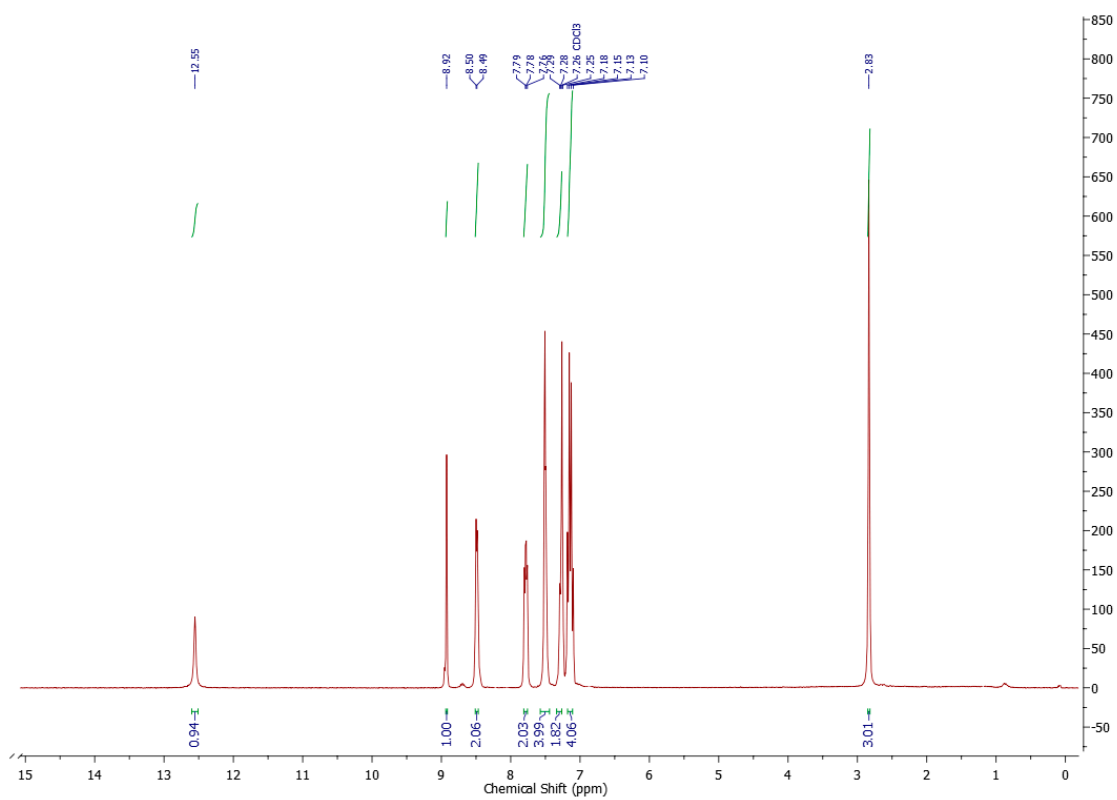

**Figure S5.**  $^1\text{H}$  NMR spectrum of compound **4a** (300M Hz,  $\text{CDCl}_3$ ).

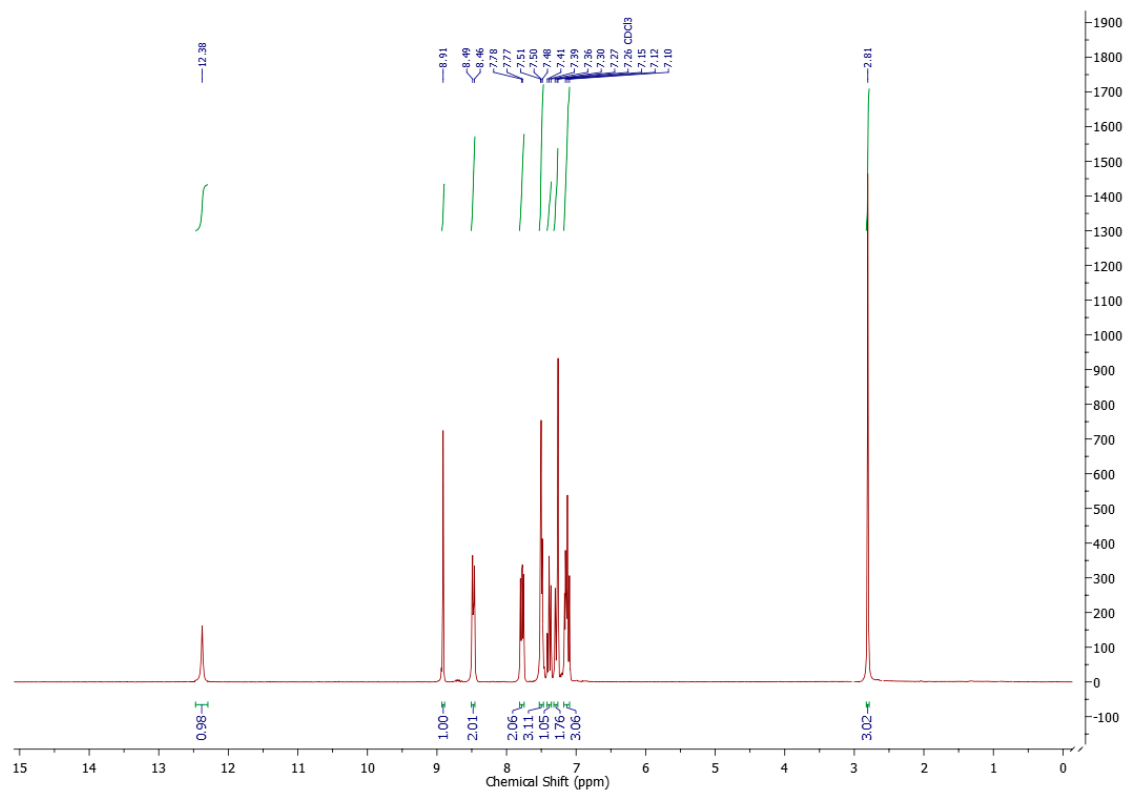

**Figure S6.** <sup>1</sup>H NMR spectrum of compound **4b** (300M Hz, CDCl<sub>3</sub>).

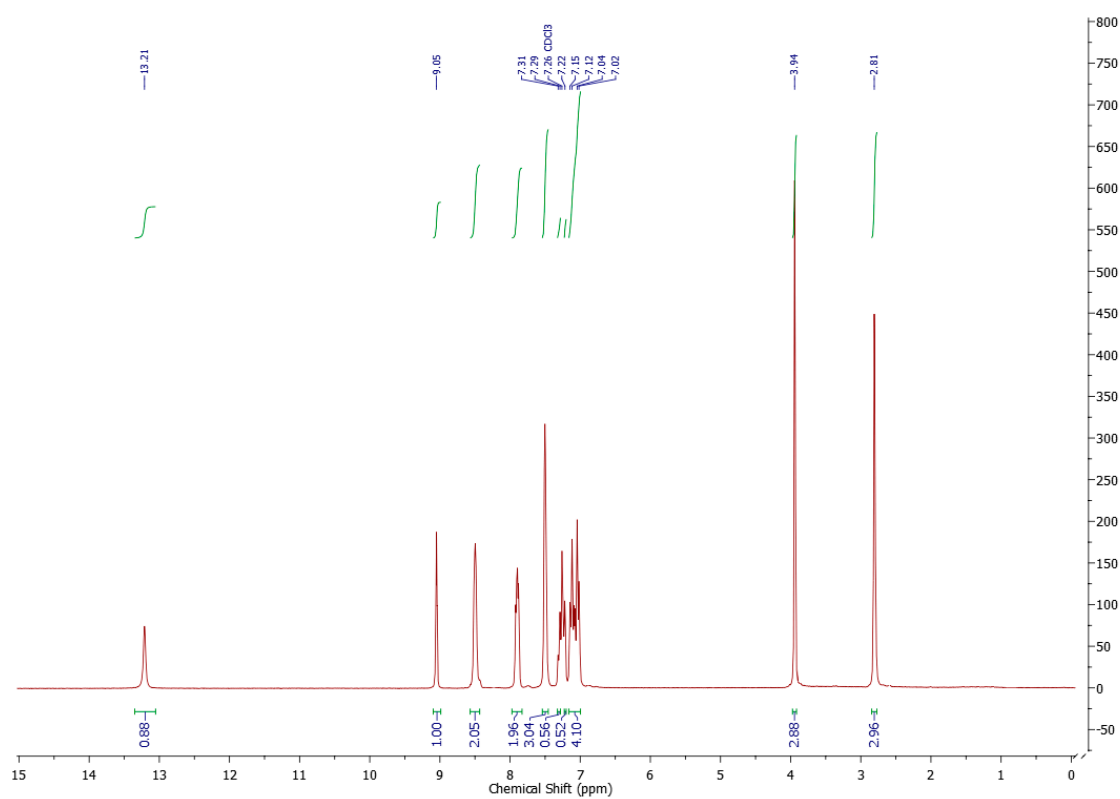

**Figure S7.** <sup>1</sup>H NMR spectrum of compound **4c** (300M Hz, CDCl<sub>3</sub>).

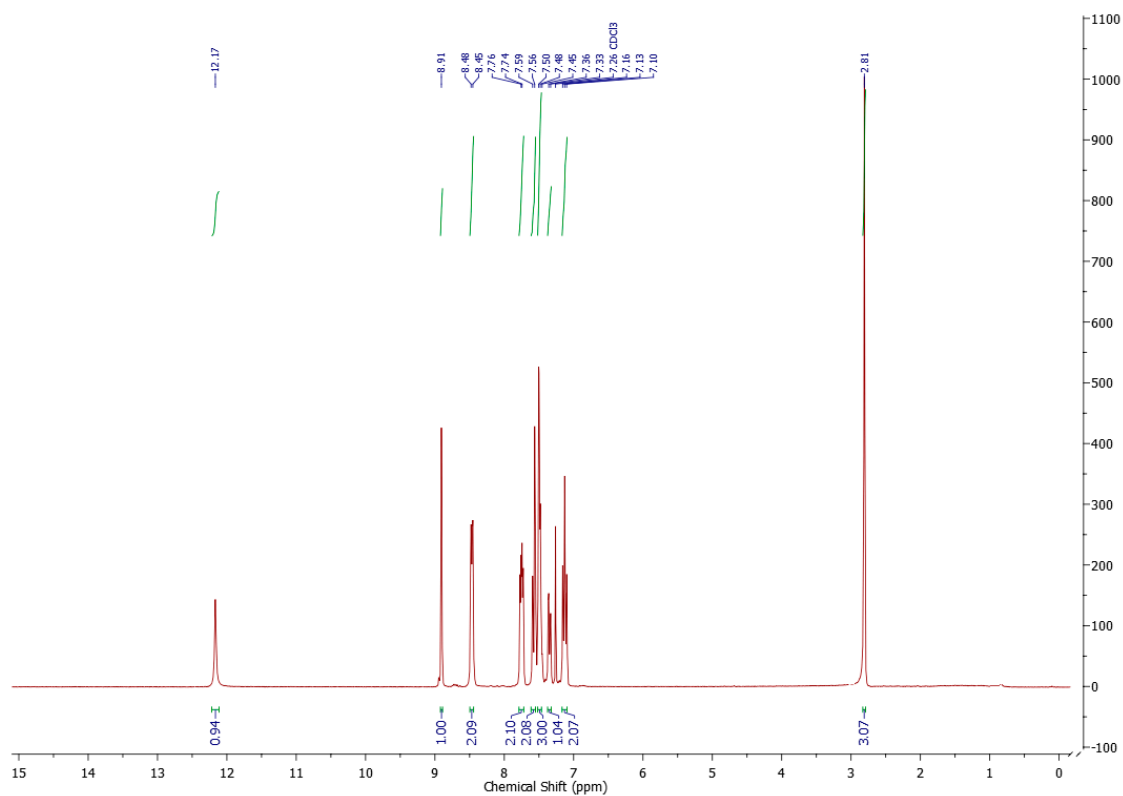

**Figure S8.** <sup>1</sup>H NMR spectrum of compound **4d** (300 MHz, CDCl<sub>3</sub>).

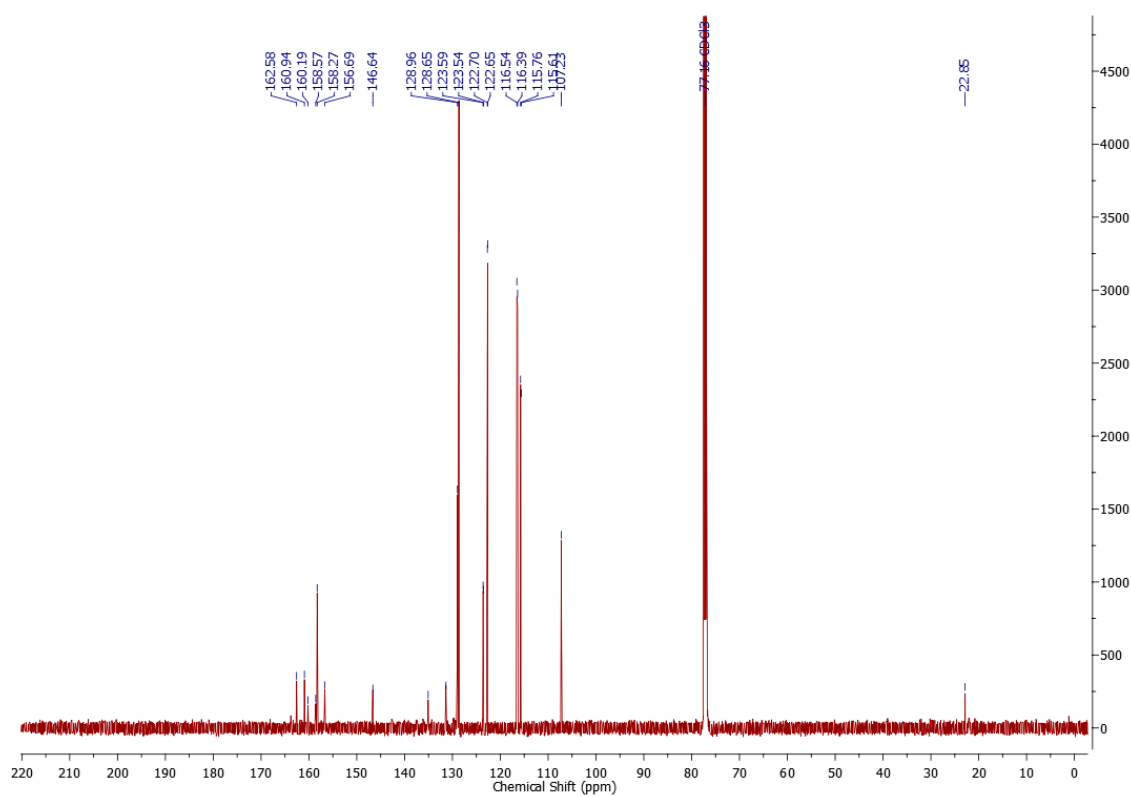

**Figure S9.** <sup>13</sup>C NMR spectrum of compound **4a** (150 MHz, CDCl<sub>3</sub>).

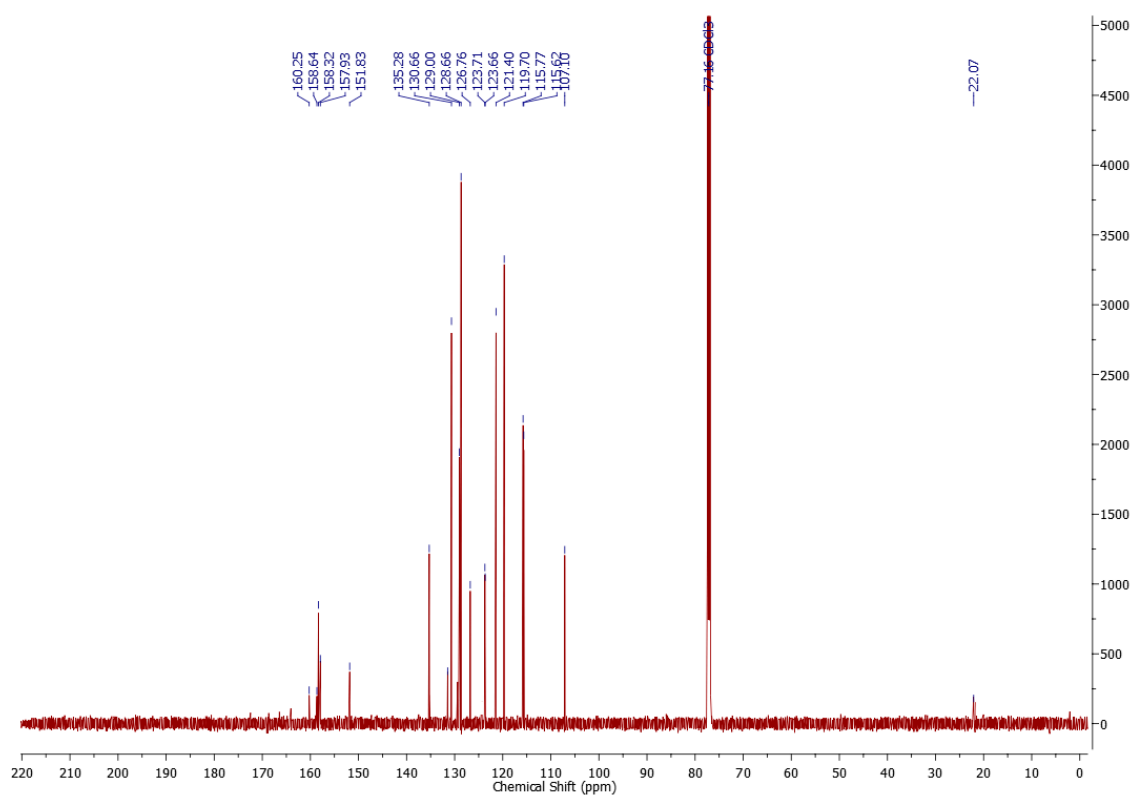

**Figure S10.** <sup>13</sup>C NMR spectrum of compound **4b** (150 MHz, CDCl<sub>3</sub>).

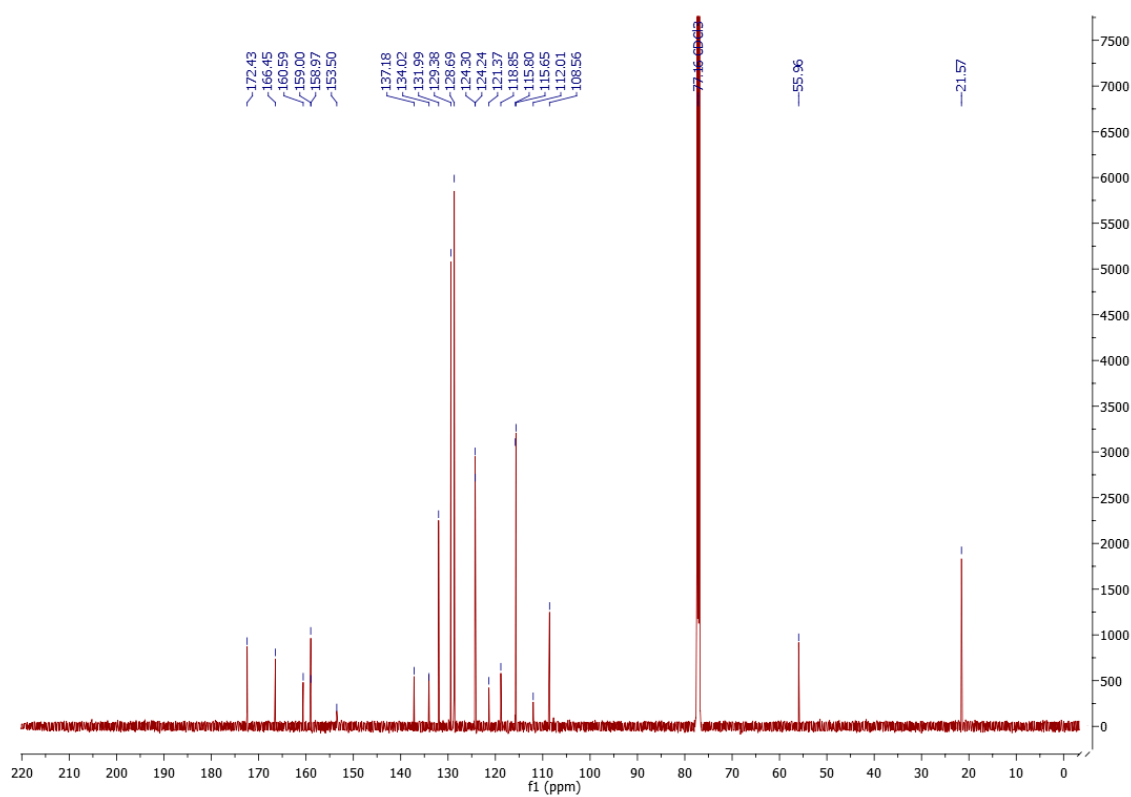

**Figure S11.** <sup>13</sup>C NMR spectrum of compound **4c** (150 MHz, CDCl<sub>3</sub>).

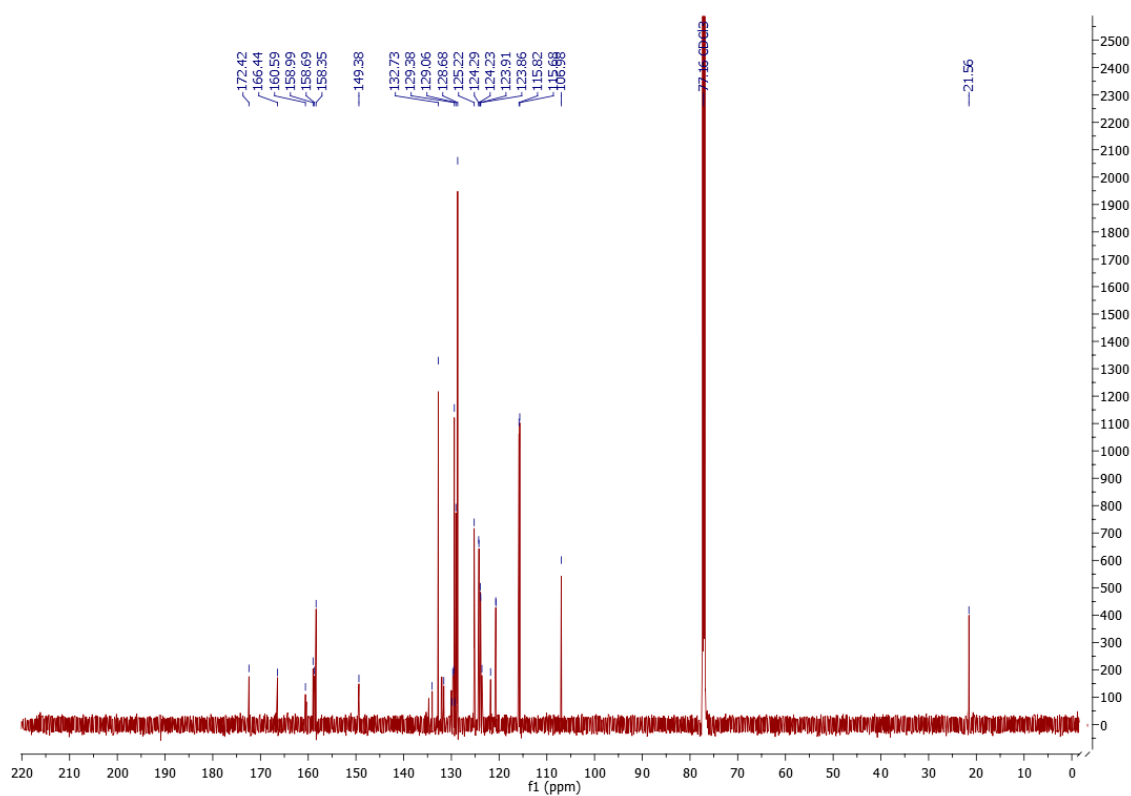

**Figure S12.** <sup>13</sup>C NMR spectrum of compound **4d** (150 MHz, CDCl<sub>3</sub>).

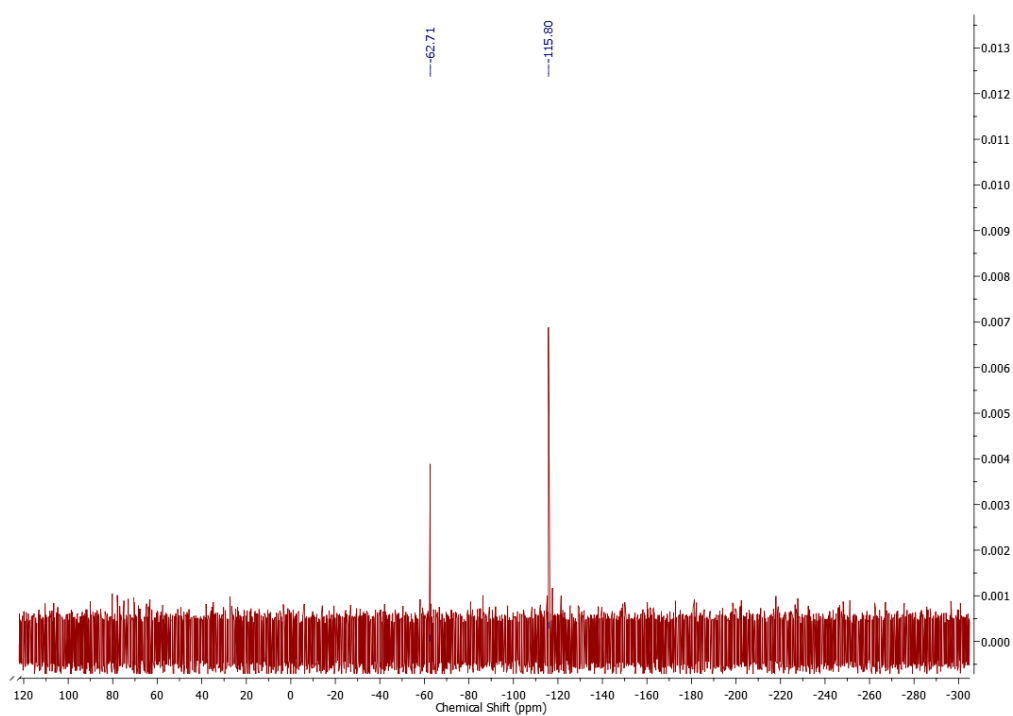

**Figure S13.** <sup>19</sup>F NMR spectrum of compound **4a** (471 MHz).



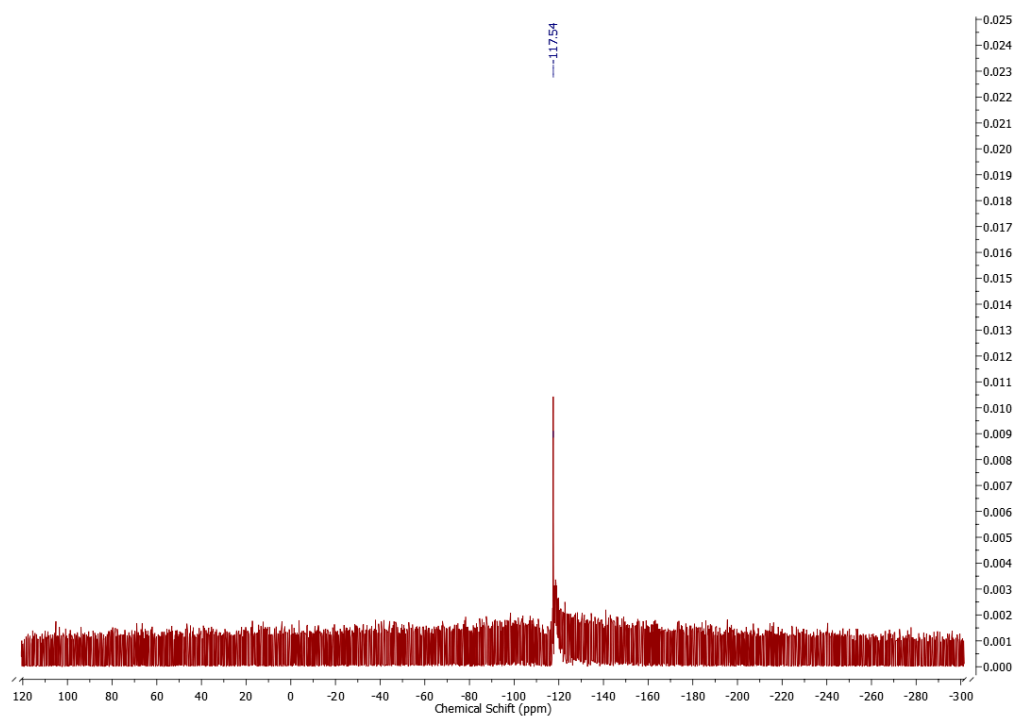

**Figure S14.**  $^{19}\text{F}$  NMR spectrum of compound **4b** (471 MHz).

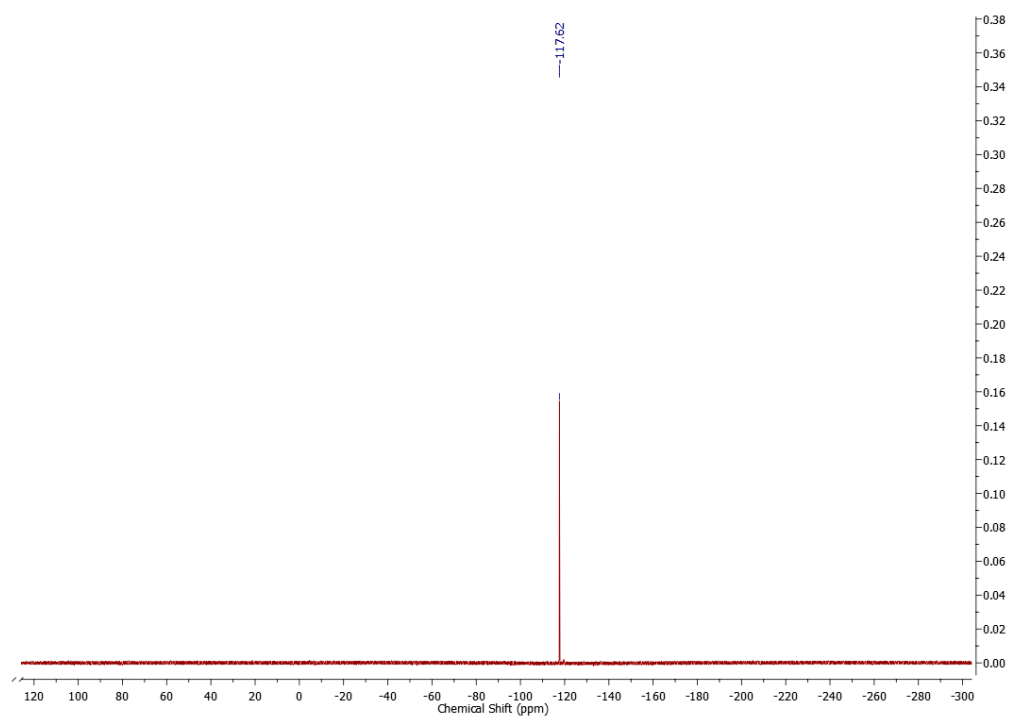

**Figure S15.**  $^{19}\text{F}$  NMR spectrum of compound **4c** (471 MHz).

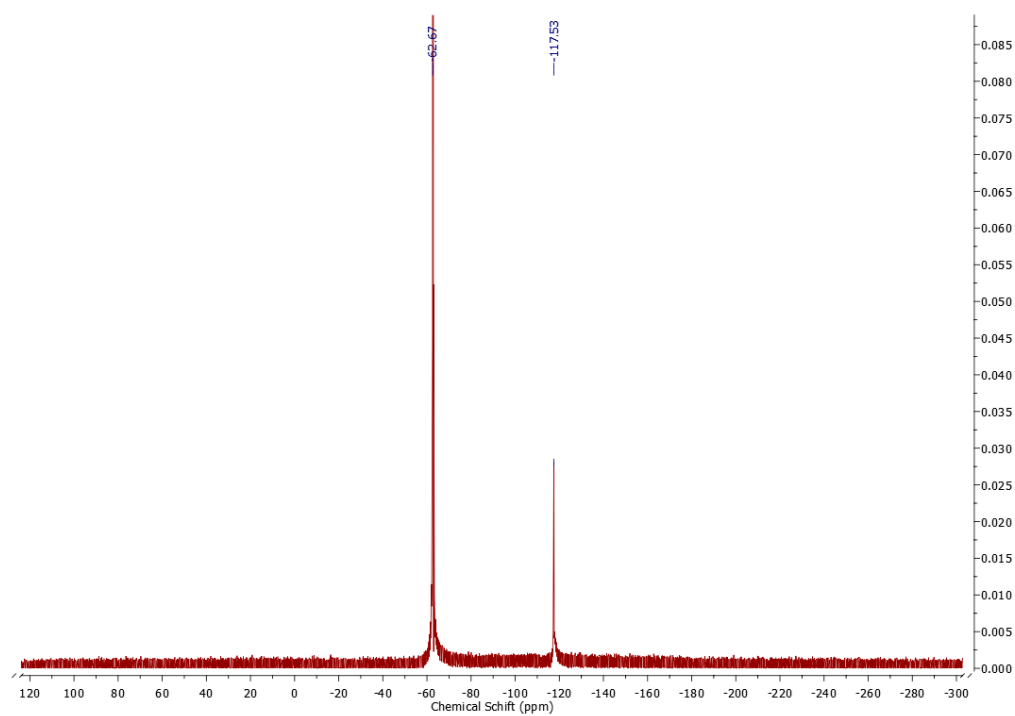

**Figure S16.**  $^{19}\text{F}$  NMR spectrum of compound **4d** (471 MHz).

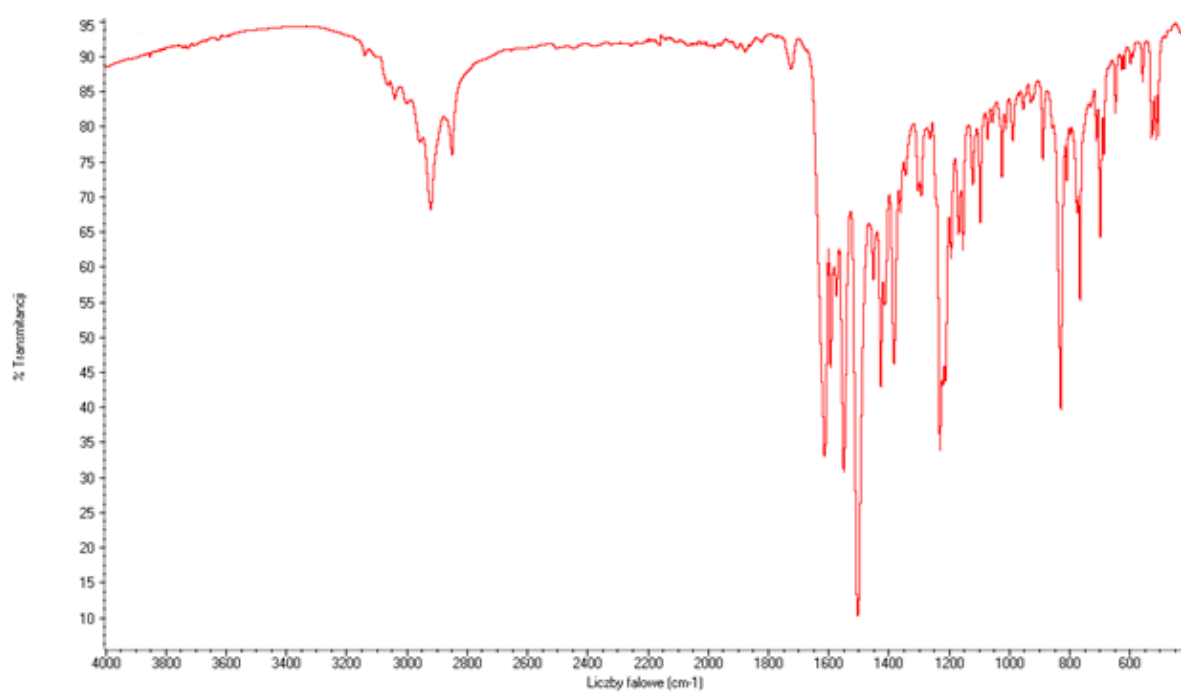

**Figure S17.** IR spectrum of compound **4a**.

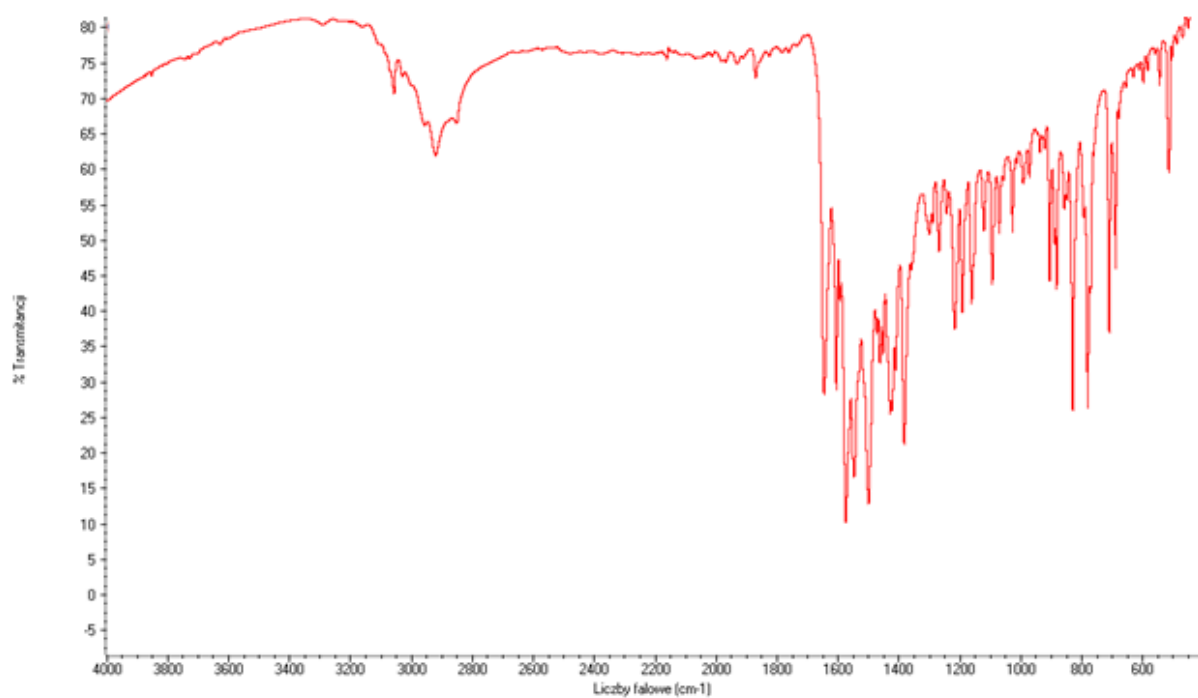

**Figure S18.** IR spectrum of compound **4b**.

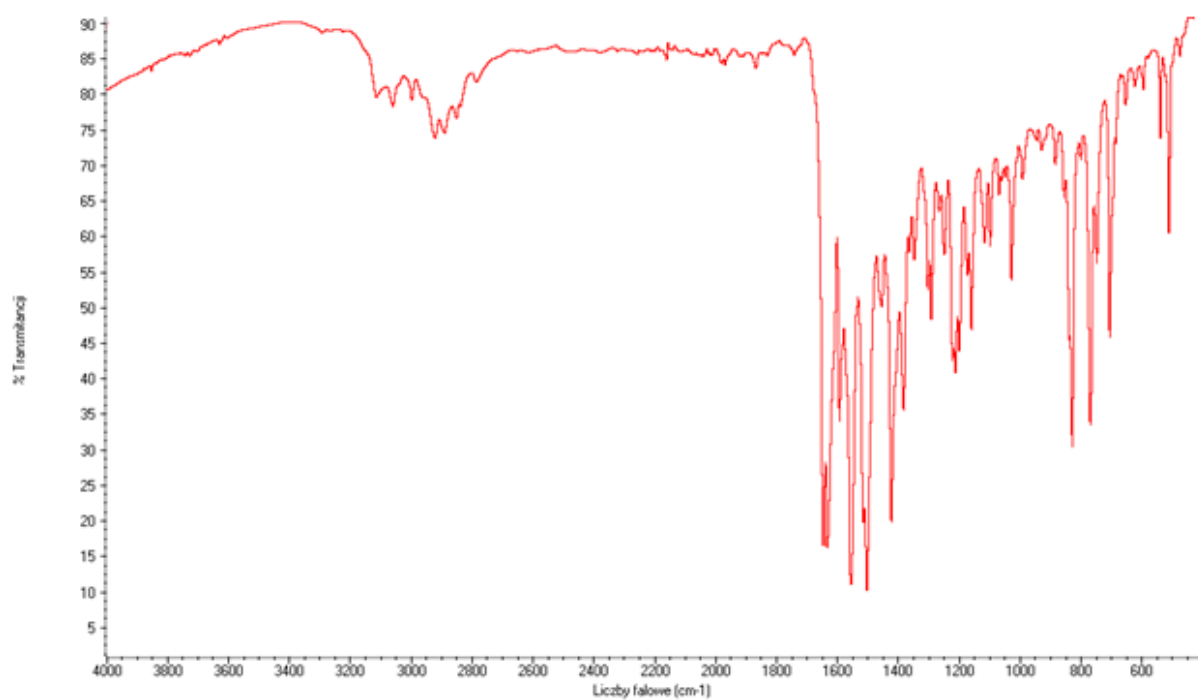

**Figure S19.** IR spectrum of compound **4c**.

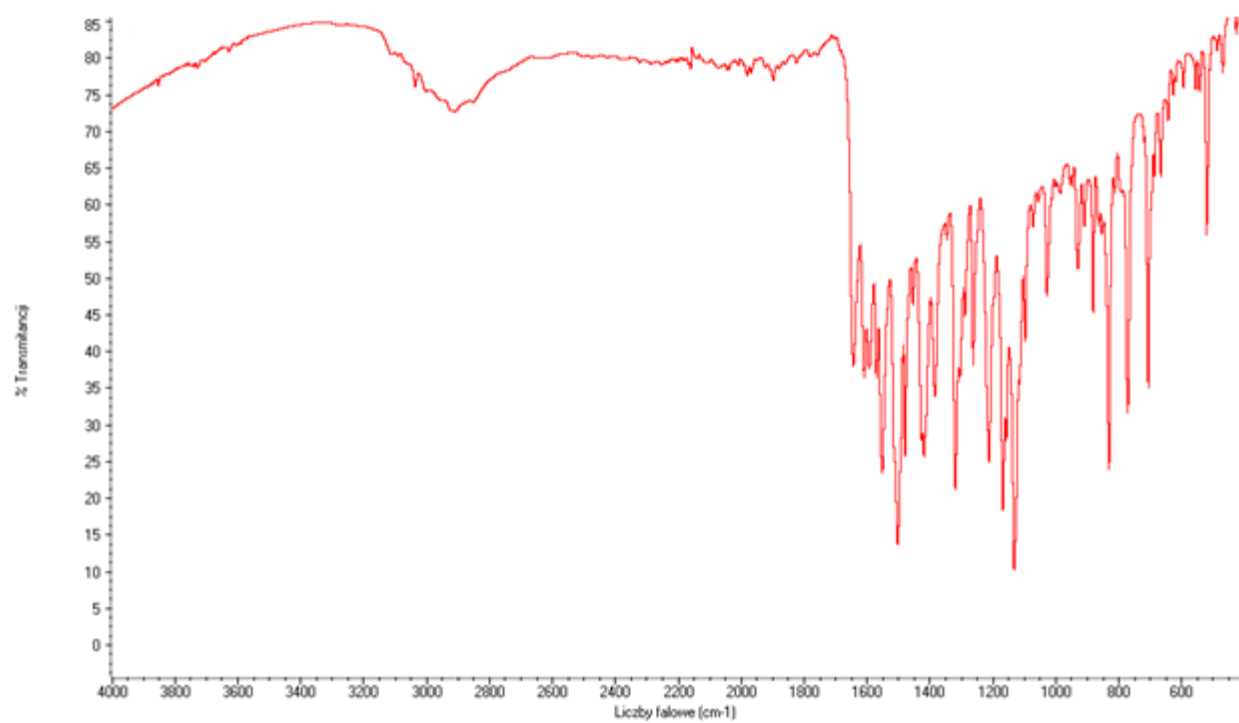

**Figure S20.** IR spectrum of compound **4d**.
